# Supplementary material for: Diamine Oxidase-Conjugated Multiwalled Carbon Nanotubes to Facilitate Electrode Surface Homogeneity
Source: MDPI journal article supplement (doi:10.3390/s22020675), 2022-01-16
Supplement: s1 [file s1]

## Supplementary Information

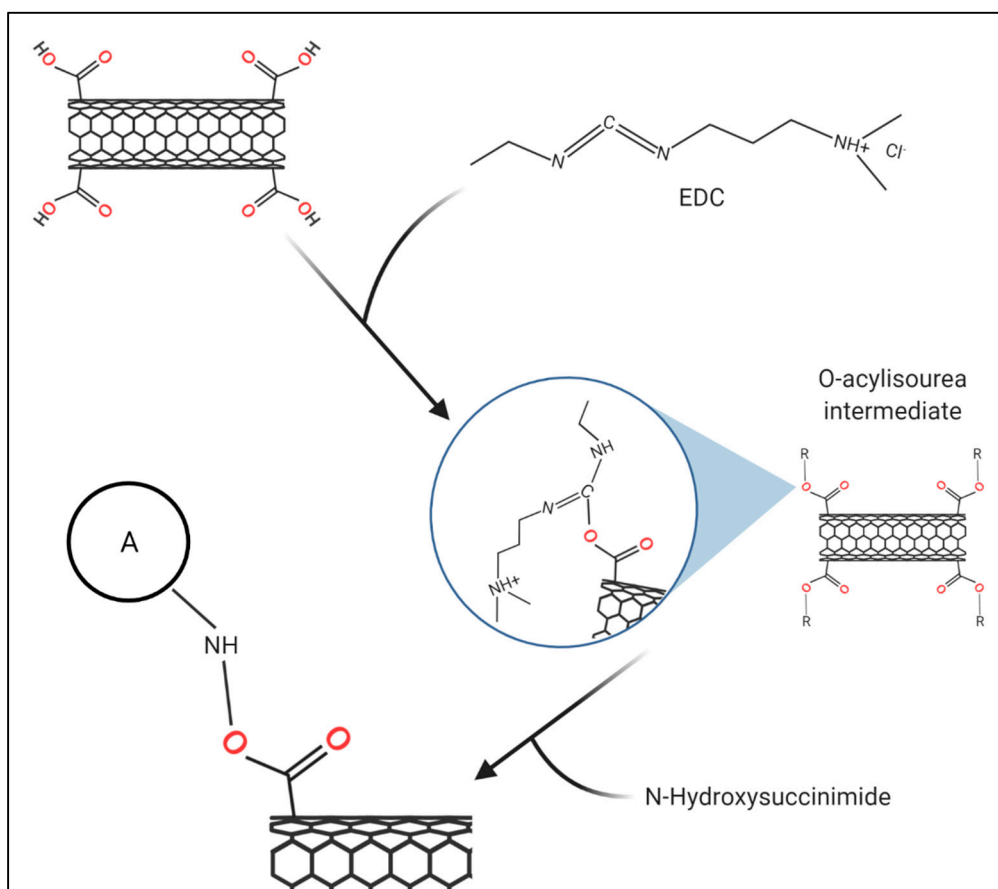

**Figure S1.** The covalent coupling of 1-ethyl-3-(3-dimethylaminopropyl)carbodiimide hydrochloride and *N*-Hydroxysuccinimide onto carboxylic acid-etched multiwalled carbon nanotubes. The *N*-Hydroxysuccinimide ester reacted with diamine oxidase to form the enzyme-conjugated MWCNTs.
